# Supplementary material
Source: PubMed Central journal article supplement (PMC5795066)

## Supplementary Figures

S1. PCA plot with age and cage as separating factors.

S2. Species richness (observed number of OTUs) for control vs. Dex-treated mice ( $P < 0.001$ ).

### Supplementary Figure 1

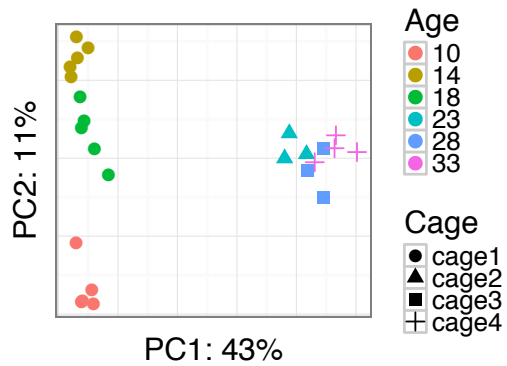

### Supplementary Figure 2

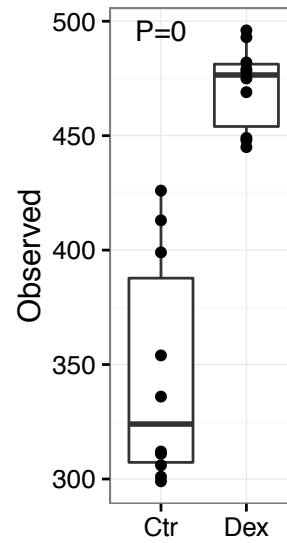

Supplement: AEM.02288-17_zam004188316s1.pdf [file AEM.02288-17_zam004188316s1.pdf]
